# Supplementary material
Source: publisher figshare collection journal article supplement (https://gsapubs.figshare.com/ndownloader/files/23306765)
Supplement: Supplementary file 1 [file 23306765]

1 **Supplementary information**

2

3 **Manuscript: Changes in Latitudinal Diversity Gradient during the Great**  
4 **Ordovician Biodiversification Event**

5

6 *Björn Kröger, Finnish Museum of Natural History, PO Box 44, FI-00014 Helsinki,*  
7 *Finland, bjorn.kroger@helsinki.fi*

8

9

10 **Additional information on Data and Methods**

11 PaleoBioDB collection data are attributed lithology and environment classes,  
12 which are used herein for estimating the relative number of  
13 carbonate/siliciclastic and shallow/deep collections. Carbonate depositional  
14 environment are all collections with primarily carbonate lithologies, siliciclastic  
15 environments include sandstone and siltstone, as well as e.g. ashes and slates.  
16 Shallow environments are all environments from shoreface and lagoonal, to  
17 shoal, and deep environments are collection classified as, e.g. offshore, shelf,  
18 slope or ramp. For estimation of environmental and lithological heterogeneity I  
19 used the PaleoBioDB primary lithology data and environment data on collections  
20 and excluded all collections with environment classes “marine indet.”,  
21 “terrestrial indet.” and “not reported. This resulted in 36 classes for the  
22 environment and 41 classes for primary lithology and a total of 23862, and  
23 18581 classified collections respectively.

24 For comparison of the qualitative variation of occurrence environment and  
25 lithology I used the HRel index (Wilcox, 1973). HRel is an index of qualitative  
26 variation based on the Shannon entropy (H) and the number of classes (herein,  
27 environmental classes), similar to the Shannon evenness of ecology. HRel can be  
28 directly compared with the Shannon (or Pielou) evenness (see e.g. Magurran,  
29 2004), where  $\ln$  is used instead of  $\log_2$  for the calculation and the number of  
30 classes is represented by the number of species or genera.

31 All estimates presented in this study have been calculated and generated with R  
32 statistical software. The HRel statistic was estimated using the Package qualvqr  
33 version 0.1.0 (<https://cran.r-project.org/web/packages/qualvar/qualvar.pdf>).  
34 The Shareholder Quorum Subsampling (Alroy, 2010) (herein:  $D_{SQS}$ ), was  
35 calculated using Alroys R function version 3.3  
36 (<http://bio.mq.edu.au/~jalroy/SQS-3-3.R>) and the Shannon Entropy Hill  
37 number (Jost, 2007; Chao et al., 2014) (herein  $D_{Chao}$ ) was calculated using the R  
38 Package iNext version 2.0.12 (Hsieh et al., 2016).

39 The capture-mark-recapture approach (CMR) herein was used for diversity  
40 estimation. The method was transferred from ecology data to fossil data  
41 following suggestions from Liow and Nichols (2010), assuming that each genus  
42 is equivalent to a captured and recaptured organism, and that the total genus  
43 number is equivalent to the size of the population. A presence-absence matrix  
44 was constructed based on the PaleoBioDB genus occurrences for  
45 chronostratigraphic stages and Bergström et al. (2009) stage slices. This matrix  
46 served for the fitting of an explicit model for diversity estimation with time  
47 varying probabilities of survival, sampling/preservation, and origination. In this  
48 case I fitted the Jolly-Seber model following the POPAN formulation, also known

49 as the "superpopulation approach" (Schwarz and Arnason, 1996) (herein:  $D_{CMR}$ ).  
50 The CMR diversity estimates have been calculated with the program MARK  
51 (<http://www.phidot.org/software/mark/>) and the R Package RMark version 2.2  
52 (Laake, 2013). The code is available for download under  
53 <https://doi.org/10.5281/zenodo.197057>.

54

## 55 **Additional information on Results**

56 The different diversity measures applied herein result in principally similar  
57 trends with most intense diversifications during the Middle Ordovician and in  
58 low latitudes (Fig. DR1). The diversity trends can be reproduced for subsets of  
59 different clades, such as brachiopods and mollusks (Fig. DR2). However,  
60 differences among clades occur. The low latitude diversification of graptolites  
61 took place earlier (during the Floian) and a strong high latitude diversification  
62 pulse is apparent in Middle Ordovician graptolites (Fig. DR3). This pattern is in  
63 general agreement to earlier estimations of graptolite diversity along  
64 paleolatitudes (Cooper et al. 2004).

65 The diversity estimates can be diagrammatically represented as trends per  
66 latitudinal zone (Fig. 2), and alternatively as gradients across latitudinal zones  
67 per time interval. Both representations have benefits and drawbacks depending  
68 on the context. Here, the latter representation is chosen (Fig. DR4) in order to  
69 emphasize the change in the LDG pattern through time. This change is most  
70 dramatic from Early to Middle Ordovician.

71 Although the Ordovician diversity trends over time are generally paralleled by  
72 sampling probabilities with peak values in Late Ordovician (Fig. DR5), the

73 individual sampling probability trends per latitudinal zones do not reflect the  
74 diversity estimates (Fig. DR6).  
75 The latitudinal changes in diversity over time do not reflect changes in  
76 environmental heterogeneity (Fig. DR7). Environmental heterogeneity,  
77 expressed as HRel statistics, herein, is generally not higher in the tropics and no  
78 significant Middle Ordovician increase in heterogeneity can be detected (Fig.  
79 DR5).  
80

81

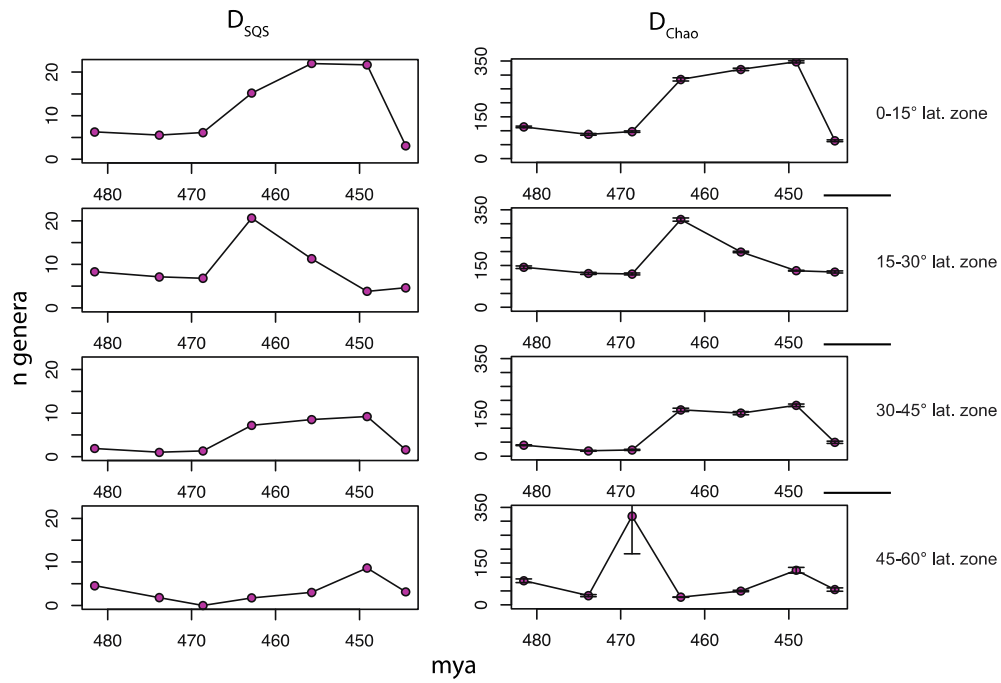

82

83 **Figure DR1.** Ordovician diversity trends of  $D_{SQS}$  and  $D_{Chao}$  within four

84 paleolatitudinal zones. Note the relatively high degree of similarity between the

85 curves, especially for low latitudes. Note also the high degree of similarity with

86  $D_{CMR}$  (compare with Fig. 2).  $D_{Chao}$  with 95% confidence intervals.

87

88

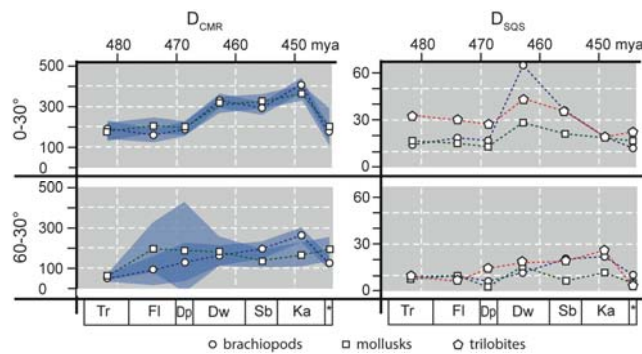

89

90 **Figure DR2.** Subsets of Ordovician diversity trends of  $D_{SQS}$  and  $D_{Chao}$  for different  
91 clades.  $D_{CMR}$  with 95% confidence intervals, shaded areas.

92

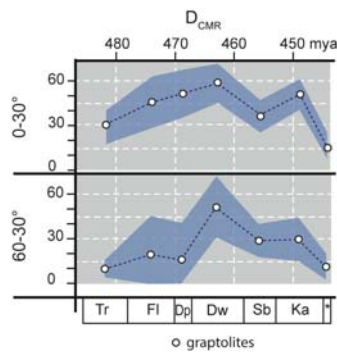

93

94 **Figure DR3.** Subsets of Ordovician diversity trends of  $D_{SQS}$  for graptolites.  $D_{CMR}$   
95 with 95% confidence intervals, shaded areas.

96

97  
98

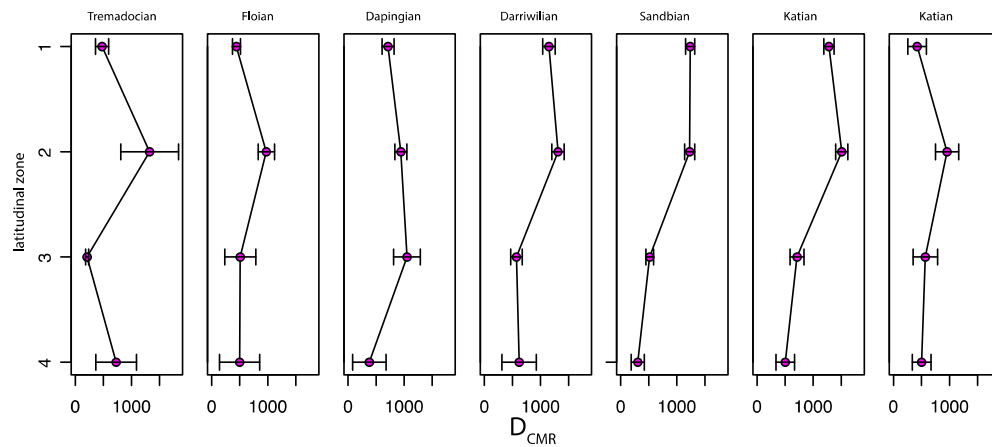

99

100 **Figure DR4.** Latitudinal diversity gradients (northern and southern hemisphere  
101 combined) for Ordovician chronostratigraphic stages. Latitudinal zones are: 1, 0-  
102 15°; 2, 25-30°; 3, 30-45°; 45-60°. With 95% confidence intervals, shaded areas.

103

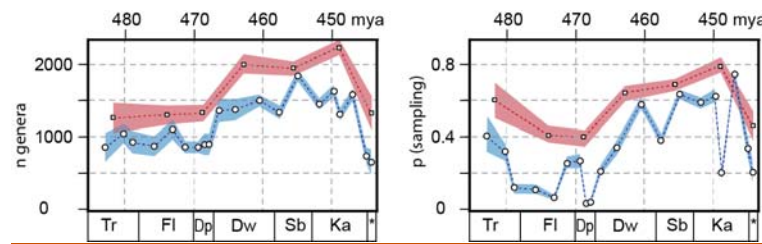

104

105

106 **Figure DR5.** Global genus-level diversity ( $D_{CMR}$ ) trends for the Ordovician Period  
107 with stratigraphic resolution at stage level and stage slice level (Bergström et al.,  
108 2009), compared with sampling probabilities ( $p_{(sampling)}$ ), with 95% confidence  
109 intervals (shaded areas). Stages: Tr, Tremadocian; Fl, Floian; Dp, Dapingian; Dw,  
110 Darriwilian; Sb, Sandbian; Ka, Katian, \* Hirnantian.

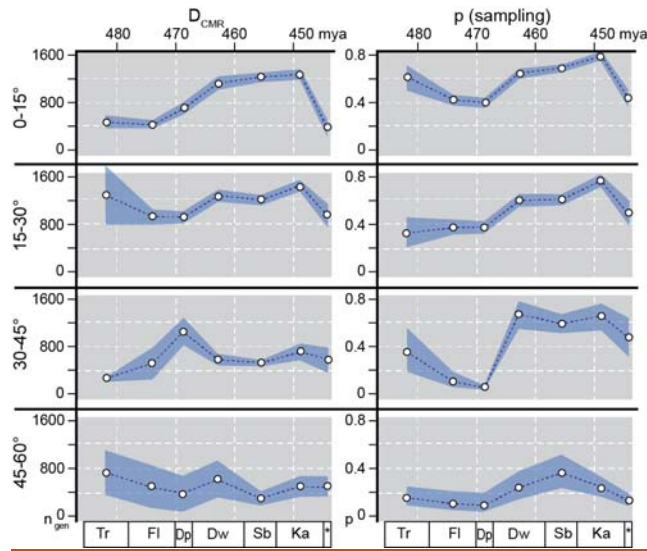

**Figure DR6.** Diversity trends ( $D_{CMR}$ ) of each latitudinal zone compared with respective sampling probabilities ( $p_{(sampling)}$ ), with 95% confidence intervals (shaded areas). Note the high sampling probabilities during the Late Ordovician.

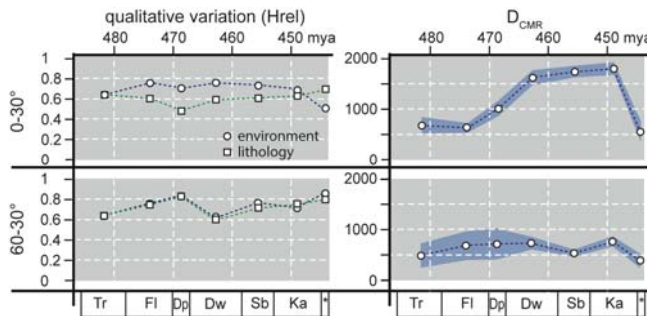

**FigureDR7.** Trend of qualitative variation (HRel index) of depositional environment (deep, shallow etc.) and lithology (carbonate, sandstone, etc) compared with diversity trends in two different latitudinal zones.  $D_{CMR}$  with 95% confidence intervals, shaded areas.



124  
125

126       **References**

- 127     Bergström, S.M., Chen, X., Gutiérrez-Marco, J.C., and Dronov, A., 2009, The new  
128         chronostratigraphic classification of the Ordovician System and its  
129         relation to major regional series and stages and to  $\delta^{13}\text{C}$   
130         chemostratigraphy: *Lethaia* v. 42, p, 97–107.
- 131     Chao, A., Gotelli, N.J., Hsieh, T.C., Sander, E.L., Ma, K.H., Colwell, R.K., and Ellison,  
132         A.M., 2014, Rarefaction and extrapolation with Hill numbers: a framework  
133         for sampling and estimation in species diversity studies: *Ecological*  
134         Society of America, v. 84 (1), 45–67 p.
- 135     Cooper, R.A., Maletz, J., Taylor, L, and Zalasiewicz, J.A., 2004, Graptolites: Patterns  
136         of diversity across paleolatitudes, *in* Webby, B.D., Paris, F., Droser, M., and  
137         Percival, I., ed., *The Great Ordovician Biodiversification Event*: New York,  
138         Columbia University Press, p. 281–293.
- 139     Hsieh, T.C., Ma, K.H., and Chao, A., 2016, iNterpolation and EXTrapolation for  
140         species diversity. R package version 2.0.12.
- 141     Jost, L., 2007, Partitioning diversity into independent alpha and beta  
142         components: *Ecology*, v. 88, p. 2427–2439.
- 143     Laake, J., 2013, RMark: An R interface for analysis of capture-recapture data with  
144         MARK. Alaska Fisheries Service Processed Report, v. 2013-01, p. 1-25.
- 145     Magurran, A.E., 2004, *Measuring biological diversity*: Oxford, Blackwell, 256 p.

146 McKinney, F.K., 1990, Classifying and analysing evolutionary trends, *in*  
 147 McNamara, K.J., ed., Evolutionary trends: Tucson, University of Arizona  
 148 Press, p. 28–58.  
 149 Novack-Gottshall, P.M., and Miller, A.I., 2003, Comparative geographic and  
 150 environmental diversity dynamics of gastropods and bivalves during the  
 151 Ordovician Radiation: Paleobiology v. 29, p, 576–604.  
 152 Schwarz, C.J., and Arnason, A.N., 1996, A General Methodology for the Analysis of  
 153 Capture-Recapture Experiments in Open Populations: Biometrics, v. 52, p.  
 154 873–860.  
 155 Wilcox, A.R., 1973, Indices of Qualitative Variation and Political Measurement:  
 156 Western Political Quarterly v. 26, p, 325–343.  
 157
